# Supplementary material
Source: PubMed Central journal article supplement (PMC3972757)
Supplement: NIHMS534553-supplement-1_si_001.pdf [file NIHMS534553-supplement-1_si_001.pdf]

## Supplementary Information

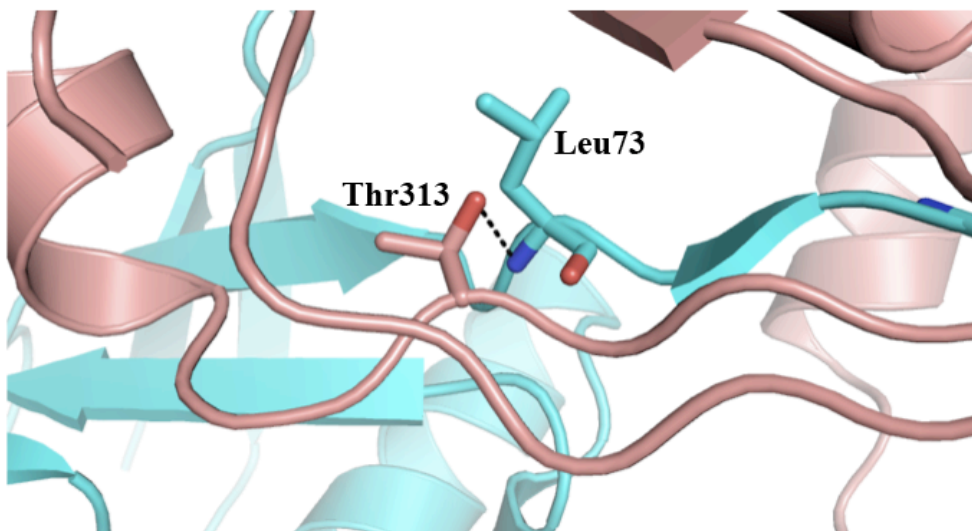

**Fig. S1. Representation of the MIC-CAP-associated mutation.** Model of the potential interaction that Thr313 adopts in the model of AMSH bound to Lys63-diubiquitin. AMSH is shown in pink ribbon, the distal ubiquitin of Lys63-diubiquitin is shown in cyan ribbon. Black dashes indicate the potential hydrogen-bonding interaction between Thr313 of AMSH and the backbone amine of Leu73 of the distal ubiquitin.

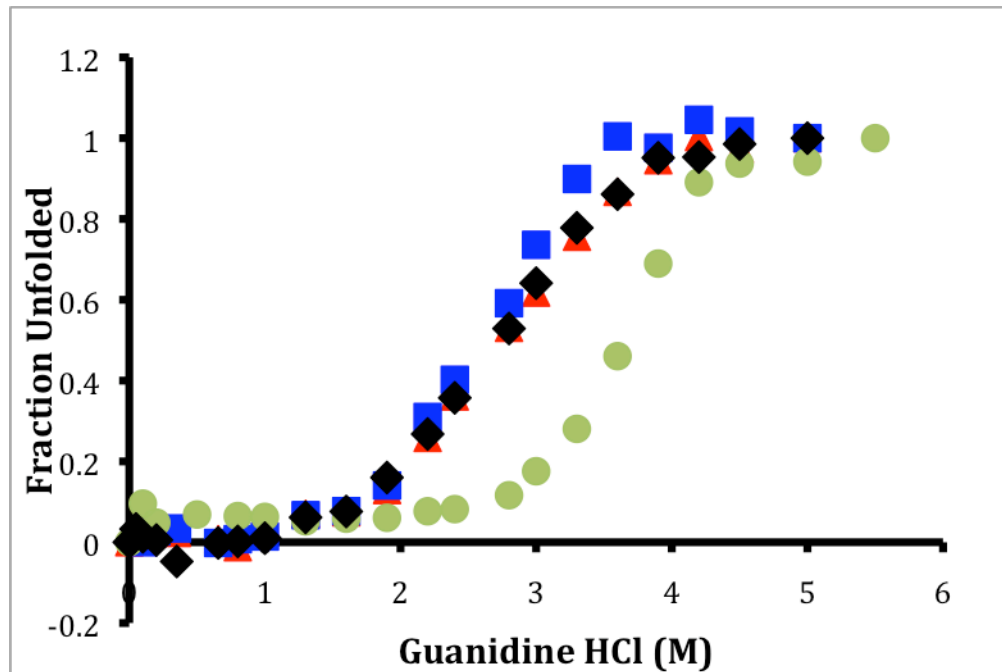

**Fig. S2.** Fraction unfolded curves comparing the thermodynamic stability of AMSH244WT (diamonds), AMSH219WT (squares), AMSH219T313I (triangles), and AMSH-LP DUB domain (circles) assessed by increasing concentrations of GdHCl monitored by CD spectroscopy at 220 nm. The fraction unfolded curves of AMSH244WT and AMSH-LP DUB domain were reported previously (Davies, C.W. *et al. J Mol Biol* (2011)).

**Supplementary Table 1. Stability Data**

| <b>Protein</b>      | <b><math>\Delta G_{H_2O}</math> (kcal.mol<sup>-1</sup>)</b> | <b>[GdHCl]<sub>0.5</sub> (M)</b> | <b>m (kcal.mol<sup>-1</sup>.M<sup>-1</sup>)</b> |
|---------------------|-------------------------------------------------------------|----------------------------------|-------------------------------------------------|
| <b>AMSH244WT*</b>   | 3.7                                                         | 2.7                              | -1.4                                            |
| <b>AMSH219WT</b>    | 3.6                                                         | 2.5                              | -1.4                                            |
| <b>AMSHT313I</b>    | 2.9                                                         | 2.7                              | -1.1                                            |
| <b>AMSH-LP DUB*</b> | 4.9                                                         | 3.5                              | -1.4                                            |

\*Data reported in our previous paper (Davies, C.W. *et al. J Mol Biol* 2011)

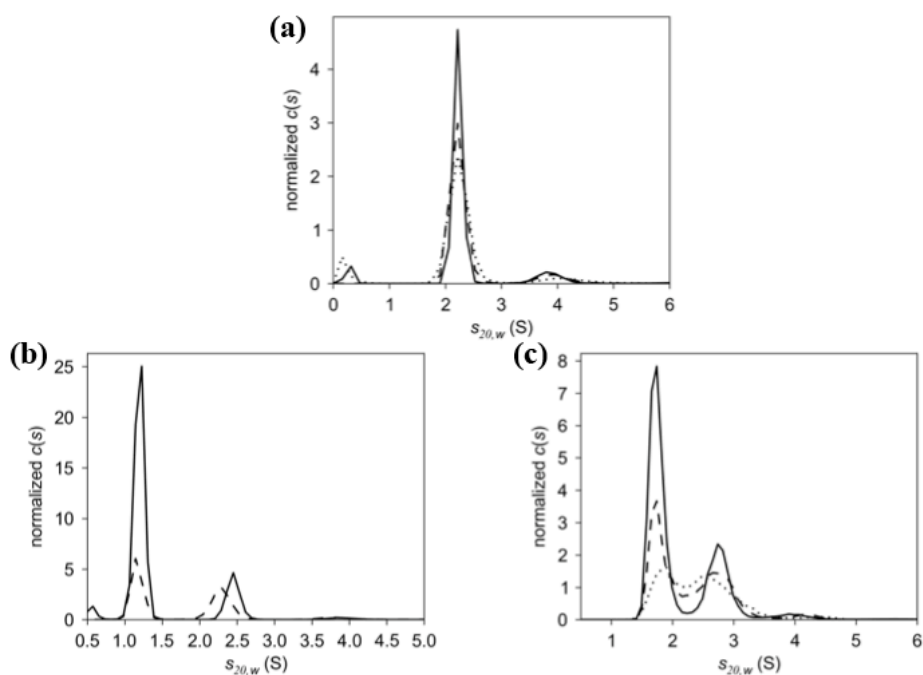

**Fig. S3.**  $c(s)$  distributions of (a) AMSH219, (b) AMSH:ubiquitin, and (c) AMSH:Lys63-diubiquitin. Three concentration series were used for AMSH219 and AMSH:Lys63-diubiquitin, while two concentrations were used for AMSH:ubiquitin. It was found that AMSH219 sediments at 2.2S, AMSH:ubiquitin complex at 2.4S, and AMSH:Lys63-diubiquitin at 2.8S, with excess ubiquitin and diubiquitin at 1.2S and 1.7S respectively. Plots were normalized to the peak area of AMSH219 or the peak area of the complexes.

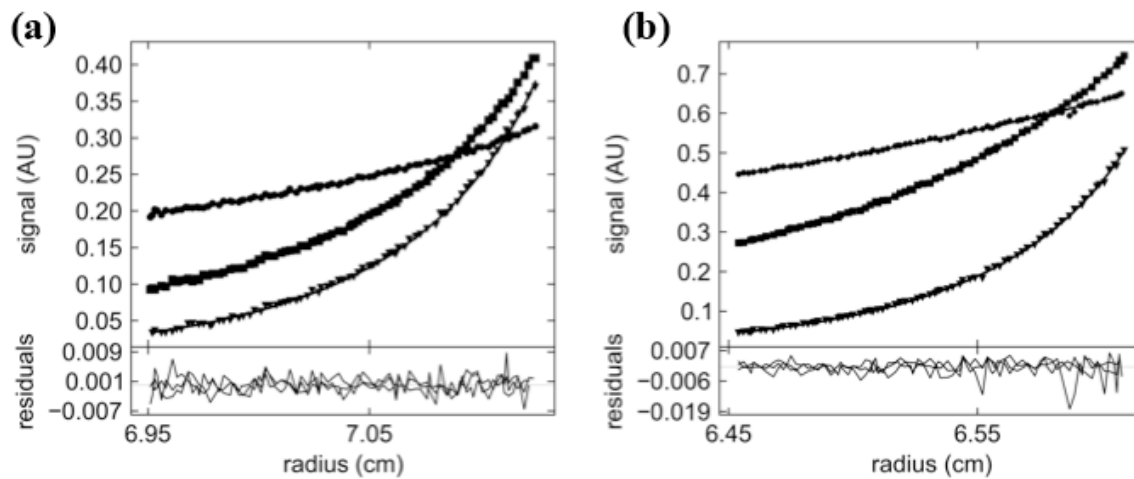

**Fig. S4.** Representative sedimentation equilibrium profiles for (a) AMSH:ubiquitin and (b) AMSH:Lys63-diubiquitin to determine the molecular weights of the complexes.

**Supplementary Table 2. AUC Data**

| <b>Protein</b> | <b>S<sub>20,w</sub><br/>(S)</b> | <b>v-bar<br/>(ml.g<sup>-1</sup>)</b> | <b>Theoretical<br/>molecular<br/>weight (Da)</b> | <b>Calculated molecular weight (Da)</b>                                   |
|----------------|---------------------------------|--------------------------------------|--------------------------------------------------|---------------------------------------------------------------------------|
| AMSH219        | 2.2                             | 0.7338                               | 23120                                            | 22000 <sup>SV</sup>                                                       |
| AMSH-SH3       | 1.3, 2.5                        | 0.7187                               | 7561 / 30664                                     | 8600 / 23000 <sup>SV</sup>                                                |
| AMSH-UIM-SH3   | 1.3, 2.6                        | 0.7170                               | 12588 / 35690                                    | 12000 / 34000 <sup>SV</sup>                                               |
| AMSH-Ub        | 1.2, 2.4                        | 0.7247                               | 8976 / 32079                                     | 8000 / 24000 <sup>SV</sup><br>8900 ± 2900 / 31500 ± 12000 <sup>SE</sup>   |
| AMSH-DiUb      | 1.7, 2.8                        | 0.7293                               | 17935 / 41037                                    | 17000 / 34000 <sup>SV</sup><br>14700 ± 3700 / 44000 ± 10000 <sup>SE</sup> |

SV-Sedimentation velocity

SE-Sedimentation equilibrium

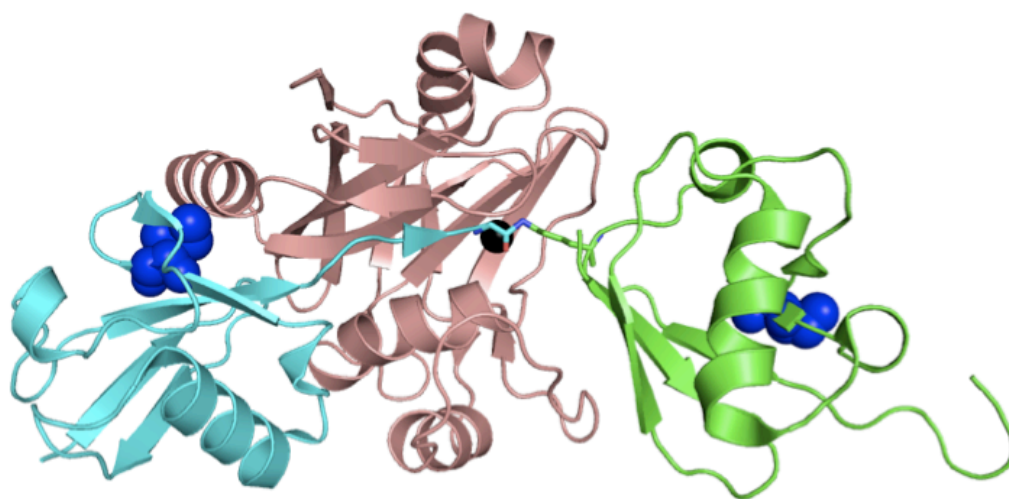

**Fig. S5.** Model of AMSH bound to Lys63-diubiquitin. Representation of AMSH (pink ribbon) bound to a Lys63-linked diubiquitin, showing Ile44 as blue spheres in both the proximal (green ribbon) and distal (cyan ribbon) ubiquitins. The active-site Zn<sup>2+</sup> is shown as a black sphere.

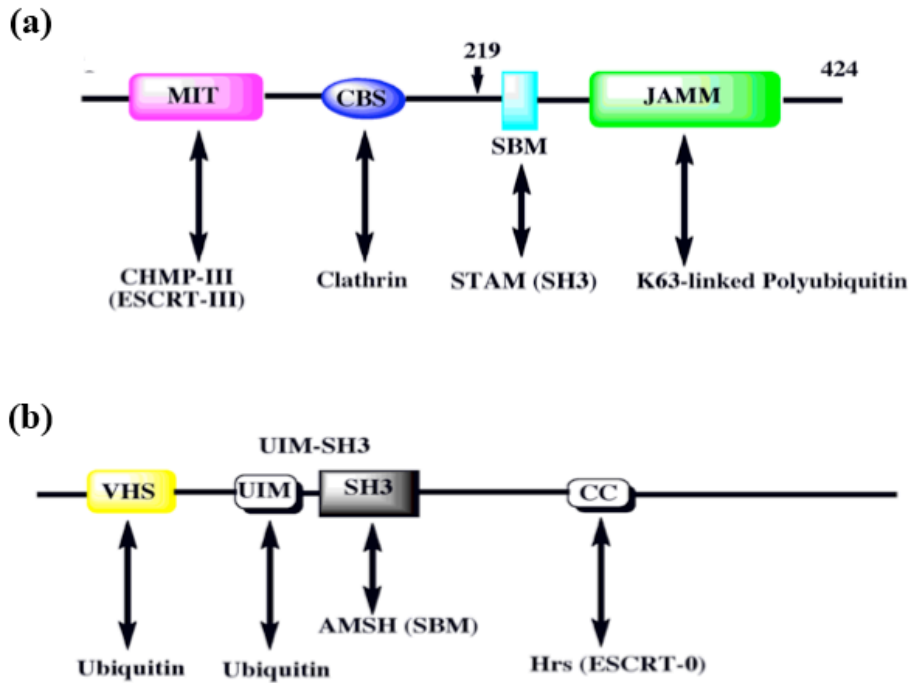

**Fig. S6.** Domain diagram of (a) full-length AMSH and (b) full-length STAM indicating the appropriate binding partners associated with each domain. Abbreviations are as follows: MIT (microtubule interacting and transport), CBS (clathrin binding sequence), SBM (SH3-binding motif), JAMM (JAB1/MPN/MOV34), VHS (Vps27, Hrs, STAM), UIM (ubiquitin-interacting motif), SH3 (Src homology 3 domain), Hrs (hepatocyte growth factor (HGF)-regulated tyrosine kinase substrate).



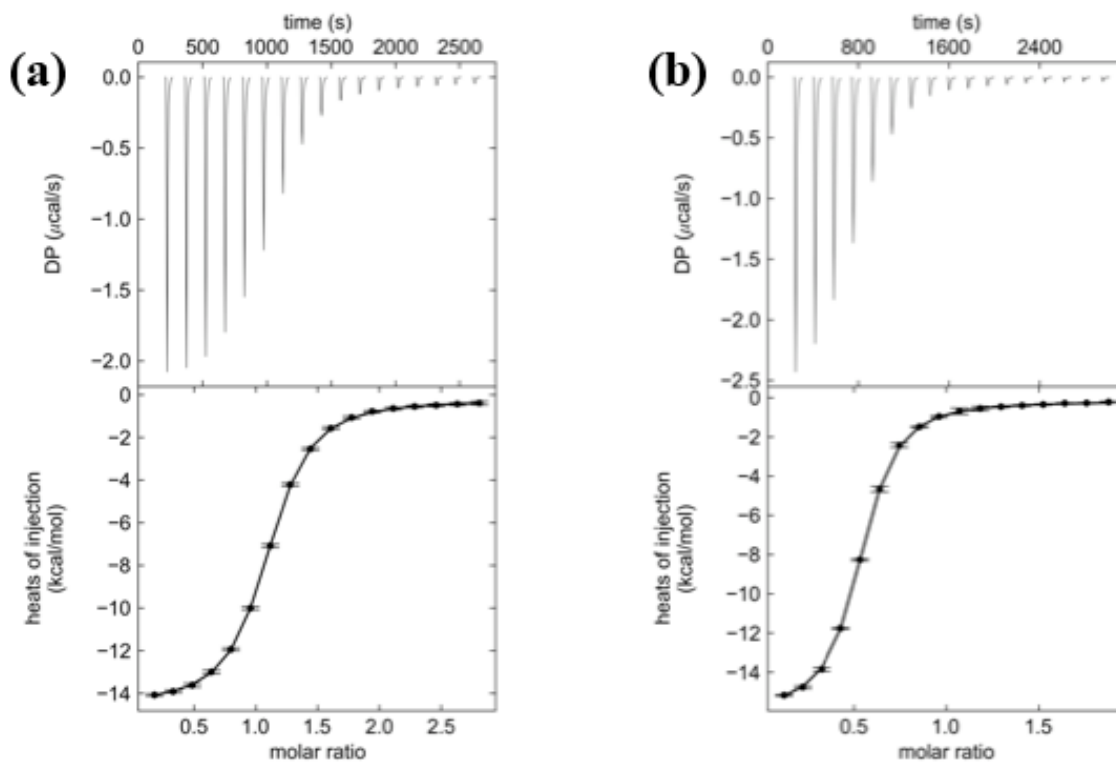

**Fig. S7.** ITC thermograms of (a) SH3 and (b) UIM-SH3 binding to the catalytic domain of AMSH revealing  $K_D$ s of  $1.4 \pm 0.04$  and  $1.9 \pm 0.1 \mu\text{M}$ , respectively.

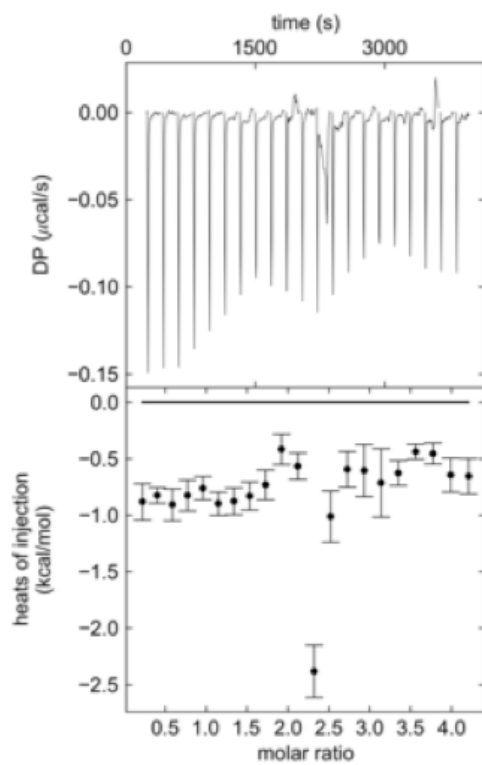

**Fig. S8.** Representative ITC thermogram of the titration of UIM-SH3 into the Lys238Thr mutant of the catalytic domain of AMSH showing no binding.

**Supplementary Table 3.** AMSH Activation Data

| <b>Protein</b> | <b><math>k_{cat}</math> (<math>s^{-1}</math>)</b> | <b><math>K_M</math> (<math>\mu M</math>)</b> |
|----------------|---------------------------------------------------|----------------------------------------------|
| AMSH           | $1.4 \pm 0.1$                                     | $32 \pm 5$                                   |
| AMSH + UIM-SH3 | $5 \pm 1$                                         | $19 \pm 3$                                   |
